# Supplementary material for: The Presence of Communicating Arteries in the Circle of Willis Is Associated with Higher Rate of Functional Recovery after Anterior Circulation Ischemic Stroke
Source: MDPI journal article supplement (doi:10.3390/biomedicines11113008), 2023-11-09
Supplement: s1 [file s1]

**Supplementary Table S1. Correlation of presence of communicating arteries with NIHSS.** A model without communicating arteries ( $R^2=1.1\%$ ) as variable is 1.094 ( $\Delta AIC=-0.18$ ) times more likely than the model that has presence of communicating arteries as variable ( $R^2=3.3\%$ ).

| Covariate                  | $\beta$ | 95% CI (asymptotic) | P value |
|----------------------------|---------|---------------------|---------|
| Intercept                  | 13.72   | 8.044 to 19.40      | <0.0001 |
| age                        | 0.01513 | -0.06382 to 0.09407 | 0.7043  |
| female                     | 0.3415  | -1.386 to 2.069     | 0.6955  |
| Antiaggregating Tx.        | 0.6820  | -0.9615 to 2.326    | 0.4118  |
| # of comorbidities         | -0.2573 | -1.268 to 0.7539    | 0.6144  |
| presence of comm. arteries | -1.164  | -2.784 to 0.4555    | 0.1567  |

**Supplementary Table S2. Correlation of presence of communicating arteries with successful recanalization.** A model without communicating arteries (Tjur's  $R^2=0.2943$ ) as variable is 3.7 ( $\Delta AIC=-2.6$ ) times more likely than the model that has presence of communicating arteries as variable (Tjur's  $R^2=0.2387$ ).

| Variable                             | OR      | 95% CI (profile likelihood) | P value |
|--------------------------------------|---------|-----------------------------|---------|
| Intercept                            | 256758  | 64.20 to 41940005616        | 0.0130  |
| age                                  | 0.8957  | 0.7658 to 0.9934            | 0.0870  |
| female                               | 0.7908  | 0.08925 to 5.185            | 0.8130  |
| Antiaggregating Tx.                  | 5.287   | 0.9196 to 49.42             | 0.0903  |
| # of comorbidities                   | 2.500   | 0.8210 to 8.685             | 0.1202  |
| presence of comm. arteries           | 6.844   | 1.278 to 52.21              | 0.0359  |
| Aspiration wo. stent* vs. with stent | 0.09418 | 0.009861 to 0.5944          | 0.0196  |
| NIHSS                                | 0.8973  | 0.6718 to 1.171             | 0.4336  |

**Supplementary Table S3. Correlation of presence of communicating arteries with ischemic lesion on control CT (score from 0 to 3).** A model without communicating arteries ( $R^2=15.28\%$ ) as variable is 4.795 ( $\Delta AIC=-3.315$ ) times more likely than the model that has presence of communicating arteries as variable ( $R^2=12.26\%$ ).

| Variable              | $\beta$   | 95% CI (asymptotic)  | P value |
|-----------------------|-----------|----------------------|---------|
| Intercept             | 2.523     | 1.495 to 3.550       | <0.0001 |
| age                   | -0.005848 | -0.01931 to 0.007613 | 0.3920  |
| female                | 0.02265   | -0.2917 to 0.3370    | 0.8870  |
| Antiaggregating Tx.   | 0.2126    | -0.1077 to 0.5329    | 0.1917  |
| # of comorbidities    | 0.1183    | -0.06612 to 0.3027   | 0.2069  |
| comm. arteries        | -0.3520   | -0.6569 to -0.04699  | 0.0240  |
| Aspiration wo. stent  | -0.8366   | -1.222 to -0.4513    | <0.0001 |
| Aspiration with stent | -0.4825   | -1.009 to 0.04394    | 0.0721  |

**Supplementary Table S4. Correlation of presence of communicating arteries with Favorable functional recovery (mRS 0-2).** A model without communicating arteries (Tjur's  $R^2=0.2943$ ) as variable

is 3.7 ( $\Delta AIC = -2.6$ ) times more likely than the model that has presence of communicating arteries as variable (Tjur's  $R^2 = 0.2387$ ).

| Variable                   | OR     | 95% CI (profile likelihood) | P value |
|----------------------------|--------|-----------------------------|---------|
| Intercept                  | 229.0  | 0.6501 to 114636            | 0.0716  |
| age                        | 0.8998 | 0.8183 to 0.9687            | 0.0123  |
| female                     | 0.7574 | 0.1747 to 3.221             | 0.7035  |
| Antiaggregating Tx.        | 1.618  | 0.3561 to 7.929             | 0.5357  |
| # of comorbidities         | 0.5309 | 0.2004 to 1.344             | 0.1827  |
| presence of comm. arteries | 11.87  | 2.952 to 61.60              | 0.0012  |
| Aspiration wo. stent       | 67.63  | 6.238 to 2489               | 0.0041  |
| Aspiration with stent      | 8.834  | 0.5299 to 351.4             | 0.1682  |
| NIHSS                      | 0.8992 | 0.7371 to 1.081             | 0.2679  |
